# Supplementary material for: The TRIM-NHL Protein LIN-41 Controls the Onset of Developmental Plasticity in Caenorhabditis elegans
Source: PubMed Central journal article supplement (PMC4148191; doi:10.1371/journal.pgen.1004533), 2014-08-28
Supplement: pgen.1004533.s010.pdf [file pgen.1004533.s010.pdf]

**Table S1. Data collection and refinement statistics for the LIN-41 filamin domain**

| <b><i>Data collection</i></b>                  |                       |
|------------------------------------------------|-----------------------|
| Space group                                    | C222 <sub>1</sub>     |
| Cell const. <i>a</i> , <i>b</i> , <i>c</i> [Å] | 44.78, 52.11, 101.31  |
| Wavelength [Å]                                 | 1.000                 |
| Resolution range [Å] <sup>a</sup>              | 50.0-1.68 (1.72-1.68) |
| Unique reflections                             | 13883                 |
| Completeness [%] <sup>a</sup>                  | 99.9 (100.0)          |
| Multiplicity                                   | 7.0                   |
| <i>R</i> <sub>sym</sub> [%] <sup>a</sup>       | 4.5 (87.8)            |
| <i>I</i> / $\sigma$ ( <i>I</i> ) <sup>a</sup>  | 20.8 (1.9)            |
| CC(1/2) [%] <sup>a</sup>                       | 99.9 (69.3)           |
| <b><i>Refinement</i></b>                       |                       |
| Resolution range [Å]                           | 50.0-1.68             |
| Reflections (all)                              | 13854                 |
| Reflections (test set)                         | 693 (5.0 %)           |
| <i>R</i> <sub>crys</sub> [%]                   | 21.9                  |
| <i>R</i> <sub>free</sub> [%]                   | 24.4                  |
| <b>RMSDs</b>                                   |                       |
| Bond lengths [Å]                               | 0.01                  |
| Bond angles [°]                                | 1.11                  |
| <b>Ramachandran plot</b>                       |                       |
| [%]                                            |                       |
| Allowed                                        | 100                   |
| Outliers                                       | 0                     |

<sup>a</sup>Values in parentheses refer to the highest resolution shell
