# Supplementary material for: The TRIM-NHL Protein LIN-41 Controls the Onset of Developmental Plasticity in Caenorhabditis elegans
Source: PubMed Central journal article supplement (PMC4148191; doi:10.1371/journal.pgen.1004533), 2014-08-28
Supplement: pgen.1004533.s011.pdf [file pgen.1004533.s011.pdf]

## SUPPLEMENTAL MATERIALS AND METHODS

### Alleles and transgenic lines used in this study:

| CGC or lab number | Genotype                                                                                                                                                                                                                                                            |
|-------------------|---------------------------------------------------------------------------------------------------------------------------------------------------------------------------------------------------------------------------------------------------------------------|
| 1284              | <i>rrrSi199</i> [ <i>Pvet-4::NLS:gfp:gfp::vet-4</i> 3'UTR; <i>unc-119(+)</i> ] (II);<br><i>rrrSi198</i> [ <i>Pvet-4::NLS:gfp:gfp::vet-4</i> 3'UTR; <i>unc-119(+)</i> ] (IV)                                                                                         |
| 1180              | <i>lin-41(rrr3)/unc-29(e1072) lin-11(n1281)</i> (I); <i>rrrSi199</i> (II);<br><i>rrrSi198</i> (IV)                                                                                                                                                                  |
| MT7897            | <i>lin-41(n2914)/unc-29(e1072) lin-11(n1281)</i> (I)                                                                                                                                                                                                                |
| OH441             | <i>otIs45[unc-119::gfp]</i> (V)                                                                                                                                                                                                                                     |
| 1283              | <i>lin-41(n2914)</i> (I); <i>otIs45</i> (V)                                                                                                                                                                                                                         |
| 1252              | <i>ojIs1[tbb-2::gfp]</i> , derived from TY3558                                                                                                                                                                                                                      |
| 1282              | <i>lin-41(rrr3)</i> (I); <i>ojIs1</i>                                                                                                                                                                                                                               |
| 1285              | <i>lin-41(rrr4)</i> (I); <i>rrrSi199</i> (II); <i>rrrSi198</i> (IV)                                                                                                                                                                                                 |
| 1414              | <i>lin-41(n2914)</i> (I); <i>rrrSi308</i> [ <i>Plin-41::lin-41</i> (C114S, C117S,<br>C130S, C151S, C154S):: <i>lin-41</i> 3'UTR; <i>unc-119(+)</i> ] (II)                                                                                                           |
| 1515              | <i>lin-41(rrr3)/hT2[qIs48]</i> (I;III); <i>lin-29(n546)/mnC1[dpy-10</i><br><i>(e128) unc-52(e444) nIs190]</i> (II)                                                                                                                                                  |
| RW10993           | <i>unc-119(ed3)</i> (III); <i>itIs37</i> [ <i>Ppie-1::mCherry:h2b::pie-1</i> 3'UTR;<br><i>unc-119(+)</i> ]; <i>stIs10116</i> [ <i>Phis-72::his-24:mCherry::let-858</i><br>3'UTR; <i>unc-119(+)</i> ]; <i>wgIs94</i> [ <i>Ppal-1::TY1:eGFP:3xFLAG</i> (P000006_G02)] |
| 1328              | <i>lin-41(rrr3)</i> (I); <i>rrrSi197</i> [ <i>Pvet-4::NLS:mCherry:h2b::vet-4</i><br>3'UTR; <i>unc-119(+)</i> ] (II) ; <i>ojIs1</i>                                                                                                                                  |
| 1320              | <i>lin-41(rrr3)</i> (I); [ <i>Plin-41::flag:gfp:lin-41::lin-41</i> 3'UTR; <i>unc-119(+)</i> ] (II)                                                                                                                                                                  |

|      |                                                                                                                         |
|------|-------------------------------------------------------------------------------------------------------------------------|
| 1334 | <i>lin-41(rrr3)</i> (I); <i>rrrSi304</i> [ <i>Plin-41::flag:gfp:ΔNHL::lin-41</i> 3'UTR; <i>unc-119(+)</i> ] (II)        |
| 1344 | <i>lin-41(rrr3)</i> (I); <i>rrrSi309</i> [ <i>Plin-41::flag:gfp:Y941A::lin-41</i> 3'UTR; <i>unc-119(+)</i> ] (II)       |
| 1412 | <i>lin-41(rrr3)/+</i> (I); <i>rrrSi298</i> [ <i>Phsp-16.41::flag:gfp:lin-41::lin-41</i> 3'UTR; <i>unc-119(+)</i> ] (II) |
| 1468 | <i>lin-41(ma104)</i> (I); <i>rrrSi199</i> [ <i>Pvet-4::NLS:gfp:gfp::vet-4</i> 3'UTR; <i>unc-119(+)</i> ] (II)           |

### Real-time quantitative PCR on dissected gonads

Primers used:

act-1 FW CTATGTTCCAGCCATCCTTCTTGG  
act-1 RV TGATCTTGATCTTCATGGTTGATGG  
tbb-2 FW GCTCATTCTCGGTTGTACCA  
tbb-2 RV TGGTGAGGGATAACAAGATGG  
vet-1 FW AAAGAACTGAAACTATGTTTGCTG  
vet-1 RV CTCTCGTCGTGTTTTCTGATG  
vet-4 FW AAGGATTTCACTGCTTGCTC  
vet-4 RV CGTCGTTTTTCGATTTCTCCG  
vet-6 FW GTGCGAGACAAGAATGTAATCC  
vet-6 RV TTCTTGA ACTCTTGGAACACAG

pes-10 FW GCGATGATTTTCATGATTTCTG  
pes-10 RV AATTCGTAGTCAATCTGCTCC  
hlh-1 FW ACGATTATGTGACTTCCTCTC  
hlh-1 RV GATGATCTCTATCGTCGTCC  
unc-120 FW GGGTATTATGAAGAAGGCATTCCG  
unc-120 RV TGCATATGTGTAGACATGACCA  
end-1 FW GGGCAATACTTTGTTCAATCG  
end-1 RV GGATACTGTTGTGAGTAGCA  
end-3 FW GCCTATTAATGACCTCCAGC  
end-3 RV CCCGTCAATTGGTATCTCTG  
elt-2 FW AGTAAACGGAGGAATGATGTG  
elt-2 RV CTGCTCTGAAGGTATTTCCA  
pha-4 FW CCAGAATTTCTGAACAACAC  
pha-4 RV GTTGGTGGAGCTGTAAAGAG  
tbx-2 FW AAGTGGAAGACGGATATTCC  
tbx-2 RV TTGTAACGGTGTTTCATCAGC  
mab-5 FW TTCATCAAATCCATTCGCCT  
mab-5 RV CATGGAAATACTGGTTGCGA  
ceh-13 FW CAGCATAACACATACAAGTGG

ceh-13 RV GAAGTTGGTTCGATTTGTTCC

php-3 FW TTATCAAGGACACAAGCGGA

php-3 RV ATTGACATAACCACTGCTCGT

hGAPDH FW GGAGTCAACGGATTTGGTC

hGAPDH RV AAACCATGTAGTTGAGGTC

### **Mutating LIN-41**

The following primer pairs were used to introduce the point mutations:

Fw\_C130S GAGTGCTGCCGTTTCGTTTCAGCGCACAAAGTGGGGTTTC

Rv\_C130S GAAACCCCACTTGTGCGCTGAAACGAACGGCAGCACTC

Fw\_C114S\_C117S GCAAGACTCCTTTCGGTCCTCAGTCTCCTCCAAGAGCTCGAC

Rv\_C114S\_C117S GTCGAGCTCTTGGAGGAGACTGAGGACCGAAAGGAGTCTTGC

Fw\_C151S\_C154S GAATTTTAGCTTCCAAGCTGTCAGGTGCCGTATCGACAGCC

Rv\_C151S\_C154S GGCTGTCGATACGGCACCTGACAGCTTGGAAGCTAAAATTC

Fw\_Y941A GTTGGCTACTTCAACGCTCCATGGGGAGTTGC

Rv\_Y941A GCACATCCCCATGGAGCGTTGAAGTAGCCAAC

The following primer pair was used to create the NHL deletion mutant:

Fw\_ΔNHL GATCCGGTGACGGAGAATAGACACTTTCTTCTTGC

Rv\_ΔNHL GCAAGAAGAAAGTGTCTATTCTCCGTCACCGGATC

### **Accession numbers of proteins used in alignments**

Q3B891 (UniProt). Protein: BRCA1. Species: *Homo sapiens*.

Q99496 (UniProt). Protein: RING2. Species: *Homo sapiens*.

Q13489 (UniProt). Protein: BIRC3. Species: *Homo sapiens*.

Q8WY64 (UniProt). Protein: MYLIP. Species: *Homo sapiens*.

P22681 (UniProt). Protein: CBL. Species: *Homo sapiens*.

E3MFJ2 (UniProt). Protein: LIN-41. Species: *Caenorhabditis remanei*.

G0MLY8 (UniProt). Protein: LIN-41. Species: *Caenorhabditis brenneri*.

Q9U489 (UniProt). Protein: LIN-41. Species: *Caenorhabditis elegans*.

Q2Q1W2 (UniProt). Protein: TRIM71. Species: *Homo sapiens*.

E1BJS7 (UniProt). Protein: TRIM71. Species: *Bos taurus*.

D3ZVM4 (UniProt). Protein: TRIM71. Species: *Rattus norvegicus*.

Q1PRL4 (UniProt). Protein: TRIM71. Species: *Gallus gallus*.

F6QEU4 (UniProt). Protein: TRIM71. Species: *Xenopus tropicalis*.

E7FAM5 (UniProt). Protein: TRIM71. Species: *Danio rerio*.

Q9V4M2 (UniProt). Protein: WECH. Species: *Drosophila melanogaster*.

1Q7F (PDB ID). Protein: Brat. Species: *Drosophila melanogaster*.
